# Supplementary material for: Downregulation of ERG and FLI1 expression in endothelial cells triggers endothelial-to-mesenchymal transition
Source: PLoS Genet. 2018 Nov 30;14(11):e1007826. doi: 10.1371/journal.pgen.1007826 (PMC6291168; doi:10.1371/journal.pgen.1007826)
Supplement: S7 Table — (XLSX) [file pgen.1007826.s021.xlsx]

## Sheet: Fig.1
Fig.1A	qPCR	ERG		Relative expression				Mean	SEM
			siControl	0.941348	1.0997	0.990775	0.96818	1	0.0347339
			siERG	0.236727	0.244192	0.224637	0.210637	0.229048	0.00734129
			siFLI1	1.04748	0.971737	1.02458	0.891787	0.983896	0.0345568
			siERG+siFLI1	0.1455	0.152034	0.128905	0.141008	0.141862	0.00487613
		FLI1		Relative expression				Mean	SEM
			siControl	1.00999	1.09989	0.988072	0.902056	1	0.0406327
			siERG	1.09758	0.937369	0.943613	0.817755	0.949079	0.0573484
			siFLI1	0.466803	0.406102	0.400481	0.242365	0.378938	0.0479361
			siERG+siFLI1	0.305194	0.286197	0.260531	0.278508	0.282607	0.00925209
Fig.1C	qPCR	CDH5		Relative expression				Mean	SEM
			siControl	0.937405	0.971448	1.00635	1.0848	1	0.0315758
			siERG	0.778279	0.752594	0.821461	0.779525	0.782964	0.0142541
			siFLI1	0.804757	0.742946	0.748881	0.735948	0.758133	0.0157645
			siERG+siFLI1	0.3422	0.322075	0.342507	0.342669	0.337363	0.00509682
		PECAM1		Relative expression				Mean	SEM
			siControl	1.01112	1.0888	0.906674	0.993413	1	0.0373736
			siERG	1.03069	1.00514	1.05462	0.938497	1.00724	0.025042
			siFLI1	0.64962	0.648448	0.671583	0.620233	0.647471	0.0105232
			siERG+siFLI1	0.103338	0.121137	0.0965665	0.108608	0.107412	0.00519643
		ACTA2		Relative expression				Mean	SEM
			siControl	1.11059	0.977178	0.938626	0.973603	1	0.0378761
			siERG	1.34642	1.25283	1.1771	1.05065	1.20675	0.0625019
			siFLI1	0.610031	0.622964	0.562108	0.579533	0.593659	0.0139098
			siERG+siFLI1	1.4363	1.34566	1.37611	1.45948	1.40439	0.0263016
		TAGLN		Relative expression				Mean	SEM
			siControl	0.977704	0.95634	1.07215	0.99381	1	0.0252431
			siERG	4.35912	4.96157	3.50693	4.36521	4.29821	0.299217
			siFLI1	0.763141	0.716679	0.7008	0.747423	0.732011	0.0141886
			siERG+siFLI1	2.55399	2.65914	3.13721	3.07586	2.85655	0.146453
		COL1A1		Relative expression				Mean	SEM
			siControl	0	0	0		0	0
			siERG	0	0	0		0	0
			siFLI1	111.456	0	0		37.1522	37.1522
			siERG+siFLI1	124.296	120.912	143.248		129.485	6.95056
		SNAI2		Relative expression				Mean	SEM
			siControl	0.49803	1.52042	0.76967	1.21188	1	0.227441
			siERG	5.21721	4.39679	5.2015	4.48169	4.8243	0.22301
			siFLI1	1.15983	1.71922	1.59721	0.990347	1.36665	0.173648
			siERG+siFLI1	25.1665	22.0168	20.6513	18.5598	21.5986	1.38555

## Sheet: Fig.3
Fig.3F	promoter assay			Relative luciferase activity						Mean	SEM
			pCI	1.31477	1.52433	0.793785	0.706435	0.73454	0.926137	1	0.13888
			pCI-Erg	2.95576	2.35044	3.99977	3.61329	4.83641	4.29773	3.67557	0.370482
			pCI-Fli1	3.57099	3.55529	2.97476	5.68445	4.33804	5.33065	4.24236	0.439801
			pCI-Erg+pCI-Fli1	13.6159	16.4018	25.7386	18.2482	24.4526	21.7664	20.0372	1.93771

## Sheet: Fig.4
Fig.4B	qPCR	miR-126		Relative expression ( 2 -ddCt )				Mean	SEM
			siControl	1	1.02101	0.993092		1.0047	0.00839553
			siERG	0.742262	0.768438	0.726986		0.745895	0.0121031
			siFLI1	0.790041	0.628507	0.602904		0.673817	0.0585801
			siERG+siFLI1	0.493116	0.479632	0.456916		0.476555	0.0105629
Fig.4C	qPCR	CDH5		Relative expression				Mean	SEM
			siControl+miR-Control	0.701019	0.877839	1.42114		1	0.216669
			siERG+siFLI1+miR-Control	0.482193	0.417416	0.446467		0.448692	0.0187324
			siERG+siFLI1+miR-126	0.902704	0.66141	0.696293		0.753469	0.0752939
		PECAM1		Relative expression				Mean	SEM
			siControl+miR-Control	1.03679	0.977088	0.986122		1	0.0185785
			siERG+siFLI1+miR-Control	0.0994628	0.102835	0.0956948		0.099331	0.00206234
			siERG+siFLI1+miR-126	0.185737	0.173407	0.177724		0.178956	0.00361237
		ACTA2		Relative expression				Mean	SEM
			siControl+miR-Control	1.00443	0.990938	1.00463		1	0.00453121
			siERG+siFLI1+miR-Control	3.17807	3.04503	3.34987		3.19099	0.0882355
			siERG+siFLI1+miR-126	1.78227	1.61872	1.69787		1.69962	0.0472229
		TAGLN		Relative expression				Mean	SEM
			siControl+miR-Control	1.06401	0.963413	0.972576		1	0.0321143
			siERG+siFLI1+miR-Control	12.4849	13.531	14.3129		13.4429	0.529526
			siERG+siFLI1+miR-126	11.5896	10.4036	13.2593		11.7508	0.828297
		COL1A1		Relative expression				Mean	SEM
			siControl+miR-Control	0	0	0		0	0
			siERG+siFLI1+miR-Control	115.114	88.5666	135.146		112.942	13.4901
			siERG+siFLI1+miR-126	14.71	15.2426	5.47683		11.8098	3.17022
		SNAI2		Relative expression				Mean	SEM
			siControl+miR-Control	1.20565	1.04103	0.753317		1	0.132179
			siERG+siFLI1+miR-Control	12.235	14.0012	13.2299		13.1554	0.51124
			siERG+siFLI1+miR-126	6.27374	6.59488	6.15671		6.34178	0.130985

## Sheet: Fig.6
Fig.6A	qPCR	B16F10	ERG		Relative expression				Mean	SEM
				NM	1.01811	0.959848	1.02204		1	0.0201078
				TCM	0.684554	0.660023	0.59587		0.646816	0.0264388
			FLI1		Relative expression				Mean	SEM
				NM	1.10544	0.874131	1.02043		1	0.0675497
				TCM	0.728061	0.346704	0.390781		0.488515	0.120447
		E0771	ERG		Relative expression								Mean	SEM
				NM	0.985832	0.969029	0.952187	1.09295					1	0.0317359
				TCM	0.702449	0.603338	0.813216	0.632961	0.699432	0.64334	0.746539	0.749059	0.698792	0.0247968
			FLI1		Relative expression								Mean	SEM
				NM	0.897078	1.10743	1.10821	0.887282					1	0.0622823
				TCM	0.80592	0.772069	0.80814	0.646499	0.978567	0.767934	0.91124	0.987358	0.834716	0.0412299
		3LL	ERG		Relative expression								Mean	SEM
				NM	1.05958	1.01702	0.923402						1	0.0402216
				TCM	0.751203	0.836511	0.807175	0.902146	0.939744	0.838789	0.831665	0.755826	0.832882	0.022966
			FLI1		Relative expression								Mean	SEM
				NM	1.01416	1.00784	0.978001						1	0.0111495
				TCM	0.756199	1.02654	0.907555	0.825737	0.743439	0.830625	0.815735	0.85307	0.844862	0.031783
Fig.6B	qPCR	4 hour	ACTA2		Relative expression				Mean	SEM
				NM	0.985038	0.987314	1.02765		1	0.0138398
				TCM	1.22244	1.05456	1.06927		1.11542	0.0536752
			TAGLN		Relative expression				Mean	SEM
				NM	0.915298	0.930881	1.15382		1	0.0770419
				TCM	1.31095	1.08584	1.20877		1.20185	0.0650756
			COL1A1		Relative expression				Mean	SEM
				NM	0.865366	0.854957	1.27968		1	0.13987
				TCM	1.07404	0.732447	1.03765		0.948045	0.10831
			SNAI2		Relative expression				Mean	SEM
				NM	0.935292	1.00161	1.06309		1	0.0369023
				TCM	0.736285	0.528472	0.592021		0.618926	0.0614805
		24 hour	ACTA2		Relative expression				Mean	SEM
				NM	0.959912	1.02046	1.01963		1	0.0200453
				TCM	4.92365	4.5281	4.51136		4.65437	0.134727
			TAGLN		Relative expression				Mean	SEM
				NM	0.941427	1.02985	1.02873		1	0.0292884
				TCM	14.1271	12.6199	12.7765		13.1745	0.478433
			COL1A1		Relative expression				Mean	SEM
				NM	0.834314	1.05141	1.11428		1	0.0848077
				TCM	59.1344	61.1136	63.7479		61.332	1.33626
			SNAI2		Relative expression				Mean	SEM
				NM	0.893769	1.116	0.990234		1	0.0643375
				TCM	36.0125	34.3051	36.566		35.6279	0.680399

## Sheet: S1 Fig
S1A Fig	qPCR	ERG		Relative expression				Mean	SEM
			siControl	0.916077	1.02556	1.05836		1	0.0430169
			siERG	0.246967	0.235473	0.235745		0.239395	0.00378681
			siFLI1	0.841322	1.07501	0.595706		0.837345	0.138377
			siERG+siFLI1	0.124196	0.146721	0.129702		0.13354	0.00677959
		FLI1		Relative expression				Mean	SEM
			siControl	0.937909	0.908111	1.15398		1	0.0774688
			siERG	0.655114	0.643141	0.608845		0.6357	0.0138651
			siFLI1	0.171724	0.183153	0.169674		0.17485	0.00419321
			siERG+siFLI1	0.0527055	0.0561203	0.0628704		0.0572321	0.00298654
S1B Fig	qPCR	CDH5		Relative expression				Mean	SEM
			siControl	0.712389	0.959188	1.32842		1	0.179001
			siERG	1.23564	1.35747	1.1798		1.25764	0.0524563
			siFLI1	0.901885	1.11123	0.536927		0.850015	0.167805
			siERG+siFLI1	0.352606	0.53105	0.527438		0.470365	0.0588885
		PECAM1		Relative expression				Mean	SEM
			siControl	0.928129	0.977975	1.0939		1	0.0491035
			siERG	0.277766	0.273171	0.372183		0.307706	0.0322656
			siFLI1	0.40654	0.47062	0.47793		0.451696	0.0226767
			siERG+siFLI1	0.0896411	0.132519	0.128097		0.116752	0.0136156
		ACTA2		Relative expression				Mean	SEM
			siControl	0.981553	1.04161	0.976838		1	0.0208493
			siERG	0.768348	0.669332	0.720764		0.719481	0.0285907
			siFLI1	1.1118	1.19997	1.06758		1.12645	0.038914
			siERG+siFLI1	3.10045	2.75715	2.77531		2.87764	0.11153
		TAGLN		Relative expression				Mean	SEM
			siControl	0.975017	0.893369	1.13161		1	0.0699006
			siERG	7.99021	7.94494	9.13901		8.35805	0.390697
			siFLI1	2.638	2.83298	2.51516		2.66205	0.0925308
			siERG+siFLI1	44.6973	53.7196	53.2083		50.5417	2.92594
		COL1A1		Relative expression				Mean	SEM
			siControl	0	0	3		1	1
			siERG	0	0	0		0	0
			siFLI1	1.70884	2.12528	0		1.27804	0.65023
			siERG+siFLI1	39.4168	51.3442	55.4917		48.7509	4.81816
		SNAI2		Relative expression				Mean	SEM
			siControl	1.08418	1.14438	0.771435		1	0.115596
			siERG	1.46744	1.48391	1.70165		1.551	0.0754727
			siFLI1	1.5161	0.972009	1.05167		1.17993	0.169655
			siERG+siFLI1	6.27798	6.74744	5.90838		6.31127	0.242787
S1E Fig	Western blotting			Relative intensity				Mean	SEM
			siControl	0.0648091	0.0645941	0.0984519		0.0759517	0.0112503
			siERG	0.13995	0.127047	0.146651		0.137883	0.00575304
			siFLI1	0.123659	0.181545	0.103242		0.136149	0.0234506
			siERG+siFLI1	0.189209	0.211688	0.182653		0.194517	0.00879198

## Sheet: S9 Fig
S9 Fig	qPCR	CDH5		Relative expression				Mean	SEM
			Control-inhibitor	0.927464	1.04345	1.02909		1	0.0365045
			miR-126 inhibitor	0.611898	0.678943	0.669596		0.653479	0.0209649
		PECAM1		Relative expression				Mean	SEM
			Control-inhibitor	0.997687	0.997687	1.00463		1	0.00231315
			miR-126 inhibitor	1.01865	0.997687	1.05457		1.02364	0.0166098
		ACTA2		Relative expression				Mean	SEM
			Control-inhibitor	0.931926	1.03404	1.03404		1	0.0340369
			miR-126 inhibitor	0.938408	1.08545	1.08545		1.03643	0.0490125
		TAGLN		Relative expression				Mean	SEM
			Control-inhibitor	0.978994	1.04201	0.978994		1	0.021006
			miR-126 inhibitor	1.64647	1.57939	1.4942		1.57335	0.0440592
		COL1A1		Relative expression				Mean	SEM
			Control-inhibitor	0.953071	0.9597	1.08723		1	0.0436564
			miR-126 inhibitor	2.25114	2.44639	2.42949		2.37568	0.0624585
		SNAI2		Relative expression				Mean	SEM
			Control-inhibitor	1.08203	1.04517	0.872807		1	0.0644805
			miR-126 inhibitor	1.81974	1.89702	1.79469		1.83715	0.0307957

## Sheet: S11 Fig
S11A Fig	qPCR	TNFα	ERG		Relative expression				Mean	SEM
				PBS	1.11807	0.993435	0.888494		1	0.0663543
				Cytokine	0.474361	0.472275	0.472556		0.473064	0.000653694
			FLI1		Relative expression				Mean	SEM
				PBS	1.08608	1.03235	0.881572		1	0.0612112
				Cytokine	0.630664	0.655901	0.596728		0.627765	0.0171431
		IL-1β	ERG		Relative expression				Mean	SEM
				PBS	0.953663	1.02634	1.02		1	0.0232405
				Cytokine	0.627909	0.644477	0.655308		0.642565	0.00796689
			FLI1		Relative expression				Mean	SEM
				PBS	0.959938	1.04552	0.994545		1	0.0248546
				Cytokine	0.541476	0.545317	0.610179		0.565657	0.0222885
		IFNγ	ERG		Relative expression				Mean	SEM
				PBS	0.963998	1.00931	1.02669		1	0.0186867
				Cytokine	0.778316	0.85587	0.875623		0.836603	0.0296961
			FLI1		Relative expression				Mean	SEM
				PBS	0.991673	1.11089	0.89744		1	0.0617573
				Cytokine	0.36164	0.432019	0.440402		0.411354	0.0249745
		FGF2	ERG		Relative expression				Mean	SEM
				PBS	0.946831	1.03278	1.02039		1	0.0268238
				Cytokine	1.13928	1.09593	1.071		1.10207	0.0199475
			FLI1		Relative expression				Mean	SEM
				PBS	0.89238	1.02517	1.08245		1	0.056293
				Cytokine	0.635702	0.686925	0.610201		0.644276	0.0225596
		TGFβ1	ERG		Relative expression				Mean	SEM
				PBS	0.953019	1.03061	1.01637		1	0.0238469
				Cytokine	0.950596	1.04606	1.04644		1.01436	0.031884
			FLI1		Relative expression				Mean	SEM
				PBS	0.981691	1.0865	0.931804		1	0.0455868
				Cytokine	0.717134	0.648622	0.738323		0.70136	0.0270691
S11B Fig	qPCR		ERG		Relative expression				Mean	SEM
				H2O	0.908208	1.02869	1.0631		1	0.0469589
				1H	1.15205	1.05408	1.0904		1.09884	0.0285945
				4H	1.05509	1.14847	1.1393		1.11429	0.0297173
				12H	1.21948	1.33364	1.14673		1.23329	0.0543963
				24H	1.33397	1.48339	1.64407		1.48714	0.0895365
			FLI1		Relative expression				Mean	SEM
				H2O	0.881485	1.05061	1.0679		1	0.0594675
				1H	1.00649	0.930917	0.842145		0.926517	0.0474933
				4H	0.748608	0.863095	0.872907		0.828203	0.0398983
				12H	0.790005	0.82311	1.01471		0.87594	0.0700376
				24H	1.04684	0.988091	1.27341		1.10278	0.086984

## Sheet: S13 Fig
S13A Fig	qPCR	PIK3R2		Relative expression				Mean	SEM
			siControl	0.962416	0.931408	1.10618		1	0.053837
			siERG	1.09707	1.26992	1.21657		1.19452	0.0510989
			siFLI1	0.851505	0.696348	0.452521		0.666791	0.116121
			siERG+siFLI1	1.09707	1.40513	1.42098		1.30773	0.105429
S13B Fig	qPCR	SNAI2		Relative expression				Mean	SEM
			siControl	0.87632	1.08578	1.0379		1	0.0633654
			siERG+siFLI1	7.73156	7.46697	8.17125		7.78993	0.205391
			siERG+siFLI1+siSNAI2#1	0.818283	1.15201	0.739073		0.903123	0.126528
			siERG+siFLI1+siSNAI2#2	2.49333	3.31214	2.76696		2.85747	0.240663
		CDH5		Relative expression				Mean	SEM
			siControl	1.02284	0.94421	1.03295		1	0.0280477
			siERG+siFLI1	0.331715	0.334017	0.297668		0.321134	0.0117515
			siERG+siFLI1+siSNAI2#1	0.272072	0.238422	0.250659		0.253718	0.0098335
			siERG+siFLI1+siSNAI2#2	0.293078	0.284486	0.322338		0.299967	0.0114572
		PECAM1		Relative expression				Mean	SEM
			siControl	1.00608	1.06369	0.930236		1	0.0386437
			siERG+siFLI1	0.178573	0.215995	0.183843		0.192804	0.0116952
			siERG+siFLI1+siSNAI2#1	0.0376305	0.0317448	0.0222133		0.0305296	0.00449184
			siERG+siFLI1+siSNAI2#2	0.0968442	0.0940366	0.115178		0.102019	0.00662883
		ACTA2		Relative expression				Mean	SEM
			siControl	1.08626	0.958602	0.955142		1	0.0431395
			siERG+siFLI1	2.15372	1.97229	1.96109		2.02903	0.0624286
			siERG+siFLI1+siSNAI2#1	3.70093	3.67067	3.26851		3.5467	0.139372
			siERG+siFLI1+siSNAI2#2	1.14151	1.09068	1.08216		1.10479	0.0185262
		COL1A1		Relative expression				Mean	SEM
			siControl	0	0	0		0	0
			siERG+siFLI1	14.8533	14.6083	10.8621		13.4412	1.2915
			siERG+siFLI1+siSNAI2#1	253.259	119.866	177.367		183.498	38.6289
			siERG+siFLI1+siSNAI2#2	68.3735	34.6683	41.3761		48.1393	10.3007
		TAGLN		Relative expression				Mean	SEM
			siControl	1.04682	0.924043	1.02913		1	0.0383203
			siERG+siFLI1	1.42944	1.44184	1.57439		1.48189	0.0463875
			siERG+siFLI1+siSNAI2#1	15.1704	16.3393	12.7276		14.7458	1.06402
			siERG+siFLI1+siSNAI2#2	3.01201	3.46185	3.4123		3.29539	0.142409
S13C Fig	qPCR	TWIST2		Relative expression				Mean	SEM
			siControl	0.862705	0.920261	1.21703		1	0.109781
			siERG+siFLI1	4.65437	3.48731	3.90743		4.01637	0.341276
			siERG+siFLI1+siTWIST2#1	0.642472	0.588303	0.726857		0.652544	0.0403127
			siERG+siFLI1+siTWIST2#2	0.47081	0.359581	0.490935		0.440442	0.0408459
		CDH5		Relative expression				Mean	SEM
			siControl	1.06646	0.537778	1.39576		1	0.249897
			siERG+siFLI1	0.685896	0.670005	0.64523		0.667043	0.0118323
			siERG+siFLI1+siTWIST2#1	0.649821	0.632356	0.771013		0.684397	0.0436006
			siERG+siFLI1+siTWIST2#2	0.505601	0.512574	0.540158		0.519445	0.0105507
		PECAM1		Relative expression				Mean	SEM
			siControl	1.00649	0.839761	1.15375		1	0.090698
			siERG+siFLI1	0.466701	0.497932	0.470451		0.478361	0.00984509
			siERG+siFLI1+siTWIST2#1	0.510362	0.503068	0.379749		0.464393	0.0423741
			siERG+siFLI1+siTWIST2#2	0.213679	0.248644	0.287019		0.24978	0.021179
		ACTA2		Relative expression				Mean	SEM
			siControl	1.05631	0.761623	1.18207		1	0.124595
			siERG+siFLI1	2.15302	2.24644	2.26626		2.22191	0.034917
			siERG+siFLI1+siTWIST2#1	2.79333	2.85873	2.95254		2.8682	0.0462023
			siERG+siFLI1+siTWIST2#2	2.07926	2.13192	2.34102		2.18407	0.0799366
		COL1A1		Relative expression				Mean	SEM
			siControl	0	0	0		0	0
			siERG+siFLI1	114.709	157.207	133.657		135.191	12.2923
			siERG+siFLI1+siTWIST2#1	149.746	77.6301	79.6926		102.356	23.7022
			siERG+siFLI1+siTWIST2#2	244.822	232.432	259.652		245.635	7.86819
		SNAI2		Relative expression				Mean	SEM
			siControl	0.968097	0.706934	1.32497		1	0.179123
			siERG+siFLI1	6.8975	7.02225	7.43425		7.118	0.162174
			siERG+siFLI1+siTWIST2#1	4.80643	4.38924	4.27508		4.49025	0.16149
			siERG+siFLI1+siTWIST2#2	8.5546	7.47476	8.19212		8.07383	0.317286
